# Supplementary figures and images for: Blocking Tumor Necrosis Factor α Enhances CD8 T-cell–Dependent Immunity in Experimental Melanoma
Source: Oxford University Press journal article supplement (doi:10.1158/0008-5472.can-14-2524), 2015-05-14

**A**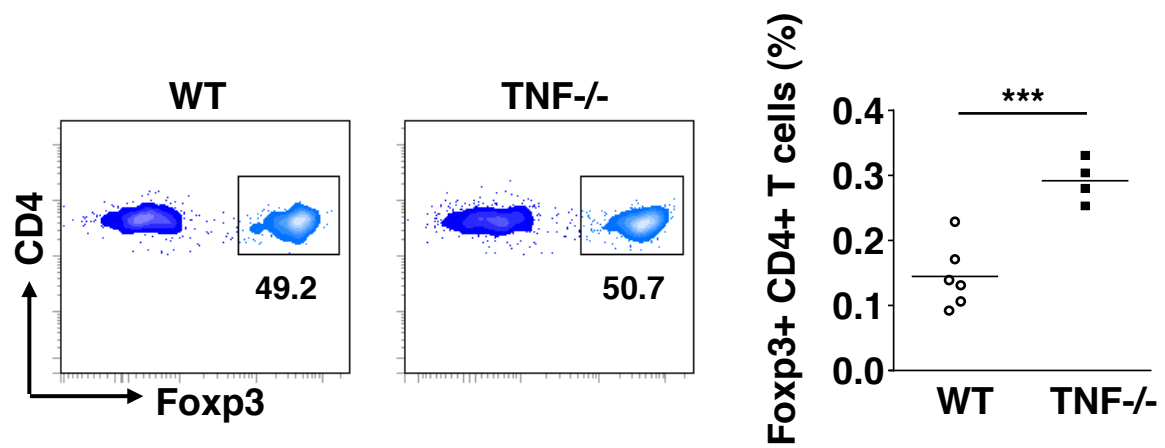**B**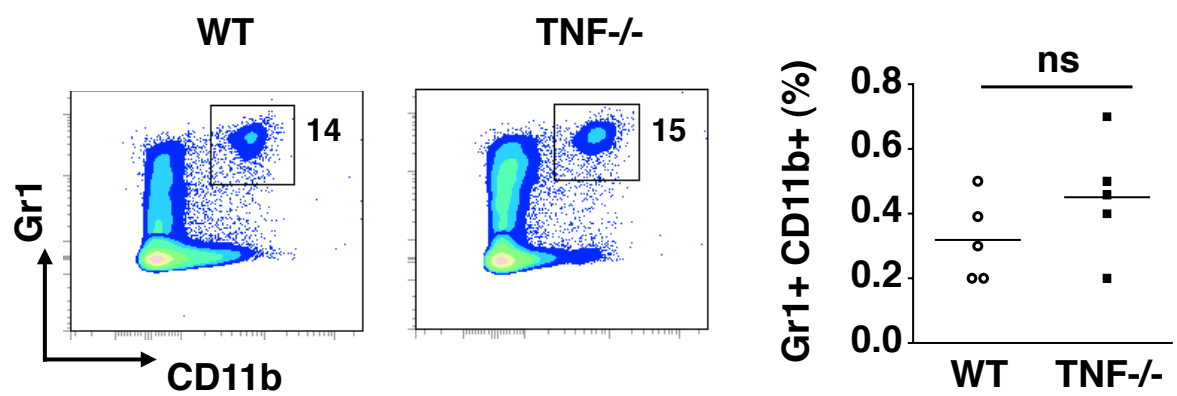

Figure S5

Supplement: 00085472can142524-sup-136961_2_supp_2922704_nm4mcw.pdf [file 00085472can142524-sup-136961_2_supp_2922704_nm4mcw.pdf]
